# Supplementary material for: Dimensionality reduction reveals fine-scale structure in the Japanese population with consequences for polygenic risk prediction
Source: PubMed Central journal article supplement (PMC7099015; doi:10.1038/s41467-020-15194-z), 2020-03-26
Supplement: 41467_2020_15194_MOESM1_ESM.pdf [file 41467_2020_15194_MOESM1_ESM.pdf]

**Supplementary Information for**

**Dimensionality reduction reveals fine-scale structure in the Japanese population  
with consequences for polygenic risk prediction.**

**Sakaue et al.**

## **Table of Contents:**

|         |                               |
|---------|-------------------------------|
| Page 3  | <b>Supplementary Figure 1</b> |
| Page 4  | <b>Supplementary Figure 2</b> |
| Page 5  | <b>Supplementary Figure 3</b> |
| Page 6  | <b>Supplementary Figure 4</b> |
| Page 7  | <b>Supplementary Figure 5</b> |
| Page 8  | <b>Supplementary Figure 6</b> |
| Page 9  | <b>Supplementary Figure 7</b> |
| Page 10 | <b>Supplementary Figure 8</b> |
| Page 11 | <b>Supplementary Table 1</b>  |
| Page 12 | <b>Supplementary Table 2</b>  |
| Page 13 | <b>Supplementary Table 3</b>  |

**Supplementary Data 1** is provided by a separate excel file.

Supplementary Figure 1.

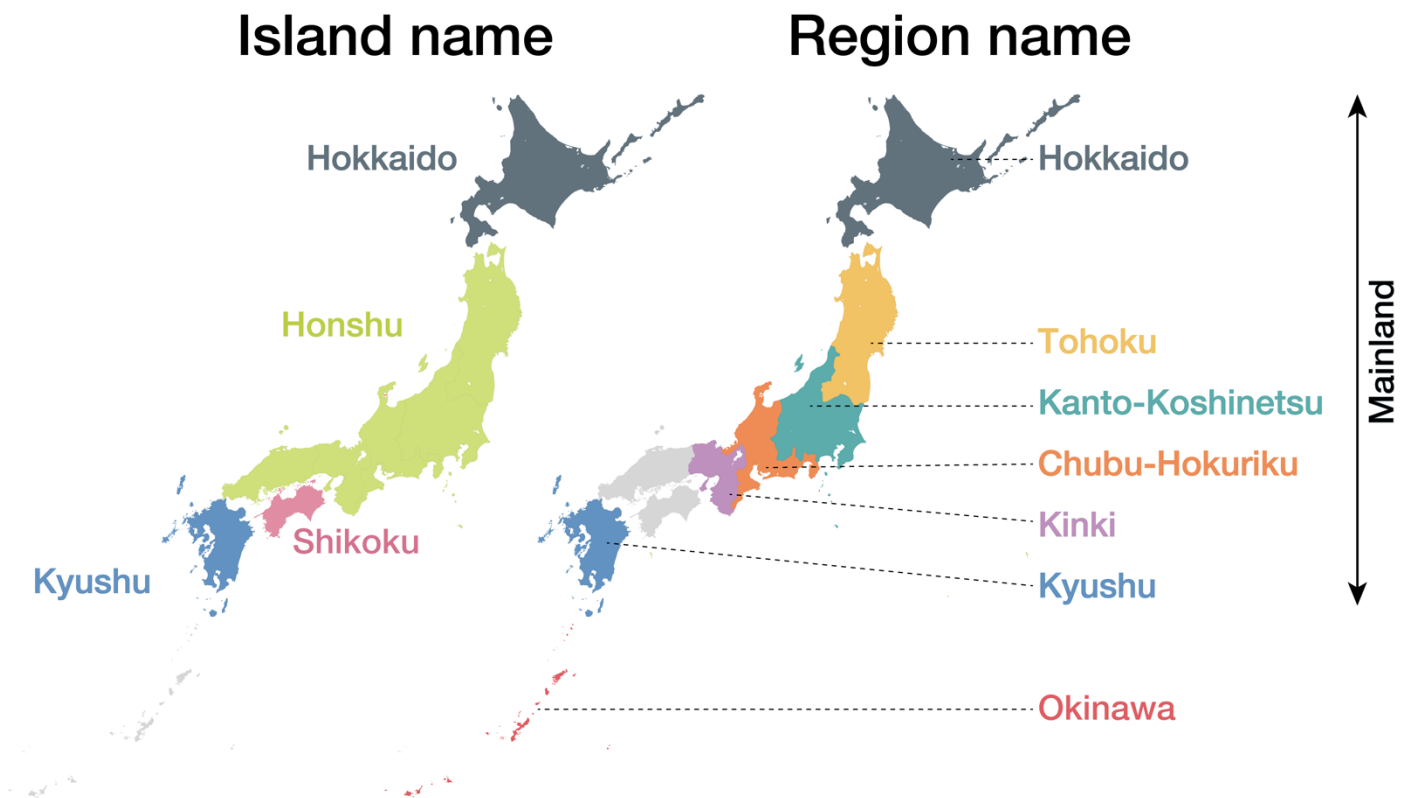

**Supplementary Figure 1. The geographic names of Japan.**

Left panel shows that the mainland of Japan consists of four major islands (i.e., “Hokkaido”, “Honshu”, “Shikoku”, and “Kyushu”). Right panel shows seven regional information of recruitment centers in our study. Of them, the mainland includes six regions (i.e., “Hokkaido”, “Tohoku”, “Kanto-Koshinetsu”, “Chubu-Hokuriku”, “Kinki”, and “Kyushu”).

**Supplementary Figure 2.**

**a** PCA

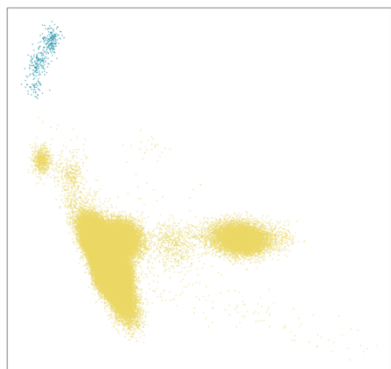

**b** *t*-SNE

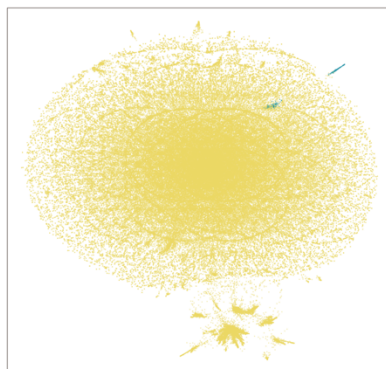

**c** PCA-*t*-SNE

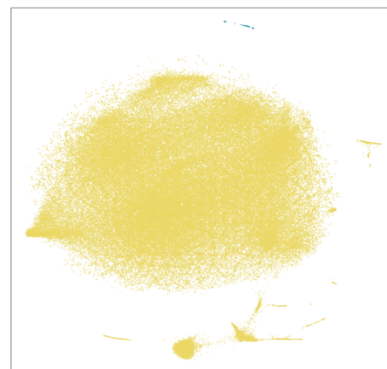

**c** UMAP

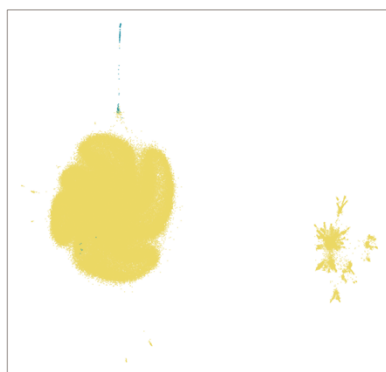

**d** PCA-UMAP

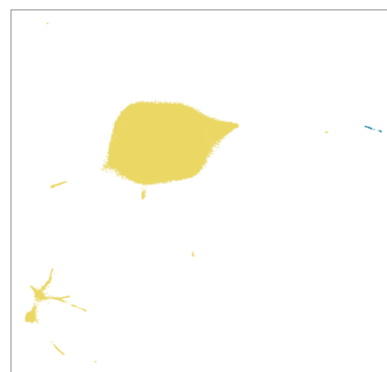

● JPT  
● EAS

**Supplementary Figure 2. Dimensionality reduction methods applied to genotype data of Japanese and other East Asian populations.**

Shown are two-dimensional illustrations of genotype data of the Japanese population in BioBank Japan (JPT) and other East Asian populations from the 1KGP (EAS). Each plot is colored in yellow (JPT) or green (EAS) according to the population. Other East Asian populations consisted of Han Chinese, Southern Han Chinese, Chinese Dai and Kihn.

**Supplementary Figure 3.**

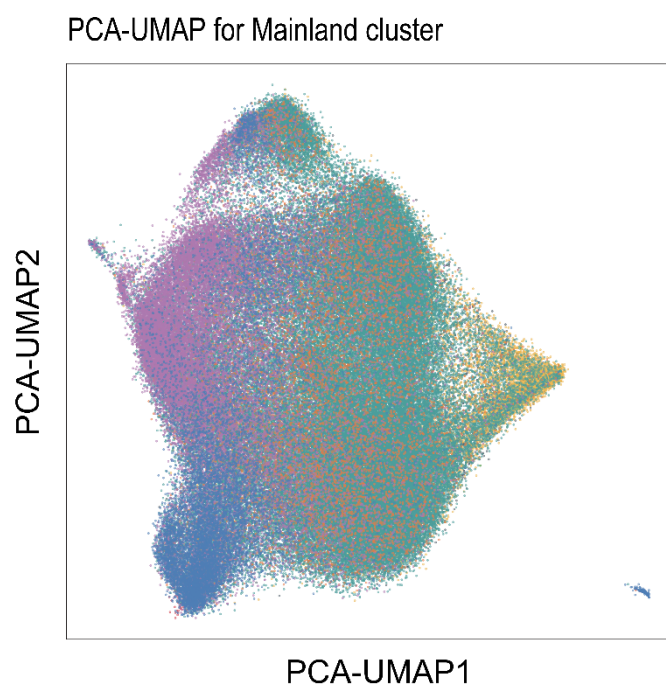

**Supplementary Figure 3. Secondary PCA-UMAP applied for mainland individuals defined by the primary PCA-UMAP.**

The color of individual points indicates the region where a given study individual was recruited. The definition of the regions and colors is the same as in **Figure 2**.

### Supplementary Figure 4.

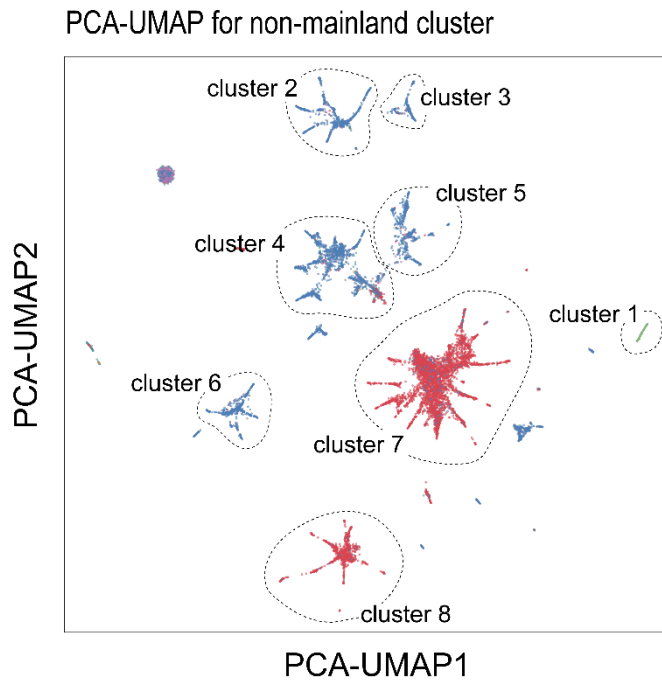

### Supplementary Figure 4. Secondary PCA-UMAP applied for non-mainland individuals defined by the primary PCA-UMAP.

The definition of subclusters according to the result of the secondary PCA-UMAP analysis for non-mainland individuals is shown by the dotted lines. The color of individual points indicates the region where a given study individual was recruited. The definition of the regions and colors is the same as in **Figure 2**.

## Supplementary Figure 5

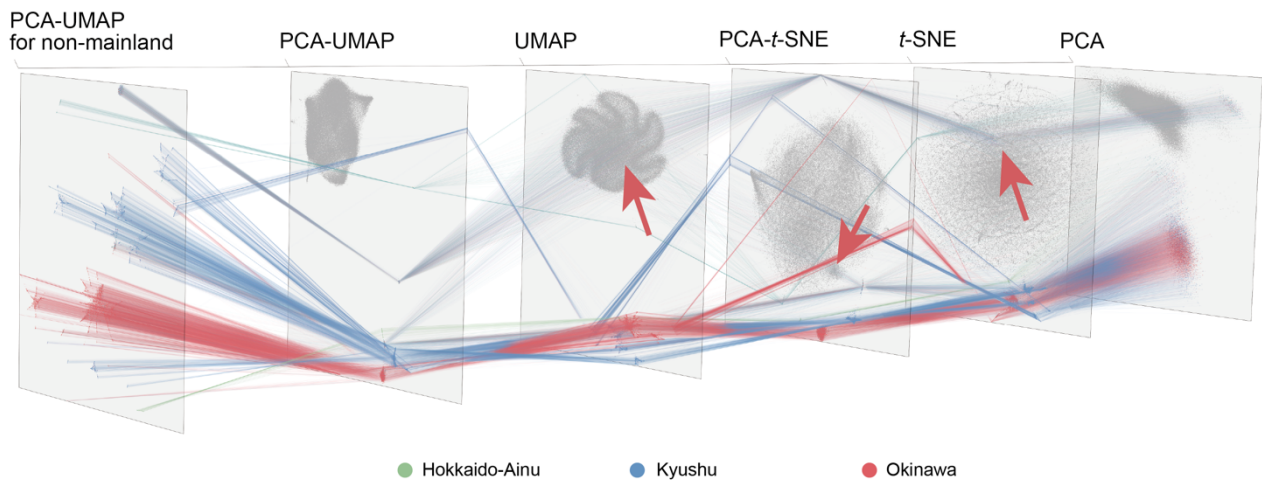

**Supplementary Figure 5. The three-dimensional paralleled illustration showing the connection between the dimensionality reduction methods.**

The results of five dimensionality reduction methods (PCA, *t*-SNE, PCA-*t*-SNE, UMAP and PCA-UMAP for all individuals, and PCA-UMAP for non-mainland individuals) are shown in transitional layers from right to left. Individuals in the non-mainland cluster are colored according to the regions in the same way as in **Figure 2** and **3**. A red arrow denotes where the individual plot of the non-mainland population, which was defined in PCA-UMAP, fell into the largest cluster (i.e., the mainland cluster) in other dimensionality reduction methods.

Supplementary Figure 6

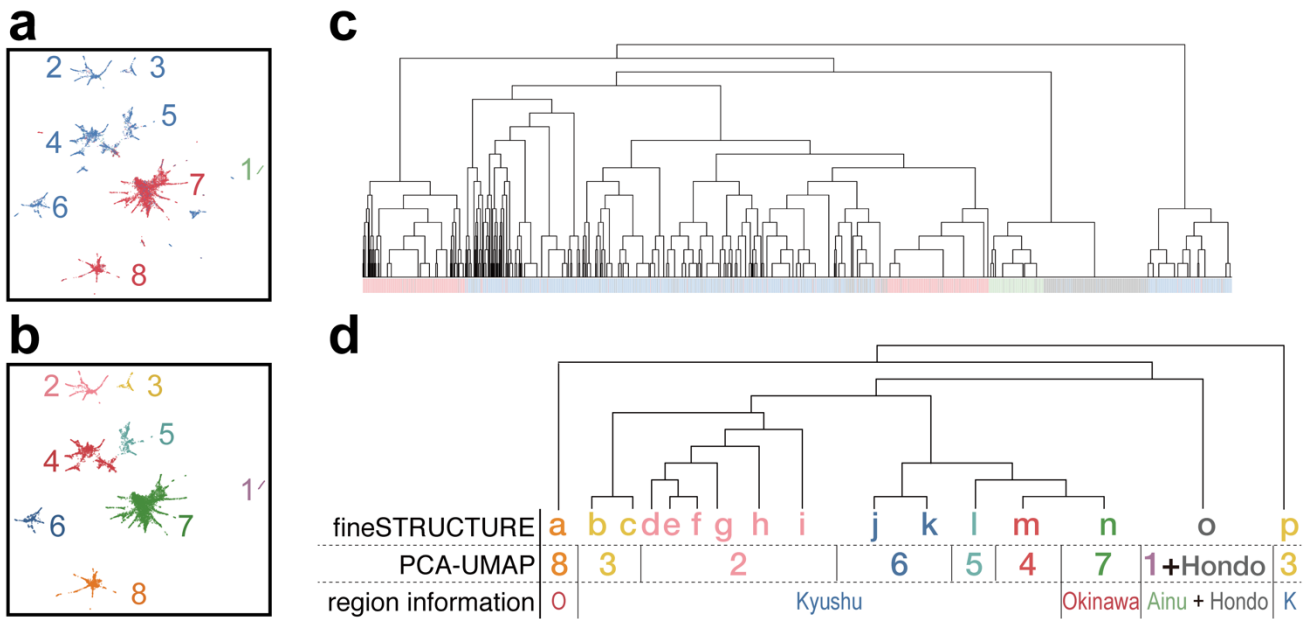

**Supplementary Figure 6. Correspondence between fineSTRUCTURE and regional information or PCA-UMAP results.**

(a) Secondary PCA-UMAP results to non-mainland individuals, annotated and colored according to the regional information of participants. A plot in green indicates an individual of Ainu, that in blue indicates an individual of Kyushu, and that in red indicates an individual of Okinawa (as in **Figure 3a**). (b) Secondary PCA-UMAP results to non-mainland individuals, annotated and colored according to the subclusters defined in **Supplementary Figure 4**. (c) A clustering result of fineSTRUCTURE, where each individual is annotated and colored according to the subclusters defined by regional information of participants (as in panel (a)). (d) A truncated hierarchical clustering of fineSTRUCTURE at the level of 16 clusters, and a correspondence across fineSTRUCTURE-defined clusters (top), PCA-UMAP-defined subclusters (middle), and the regional information of recruitment centers (bottom). O; an abbreviation for Okinawa. K; an abbreviation for Kyushu.



## Supplementary Figure 7.

**a**

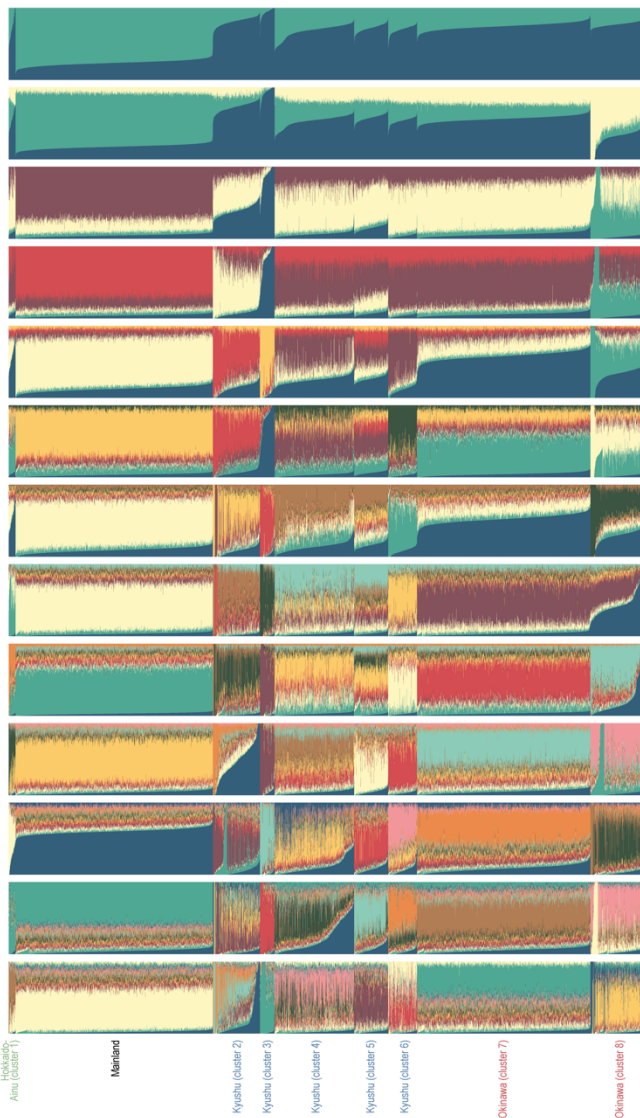

**b**

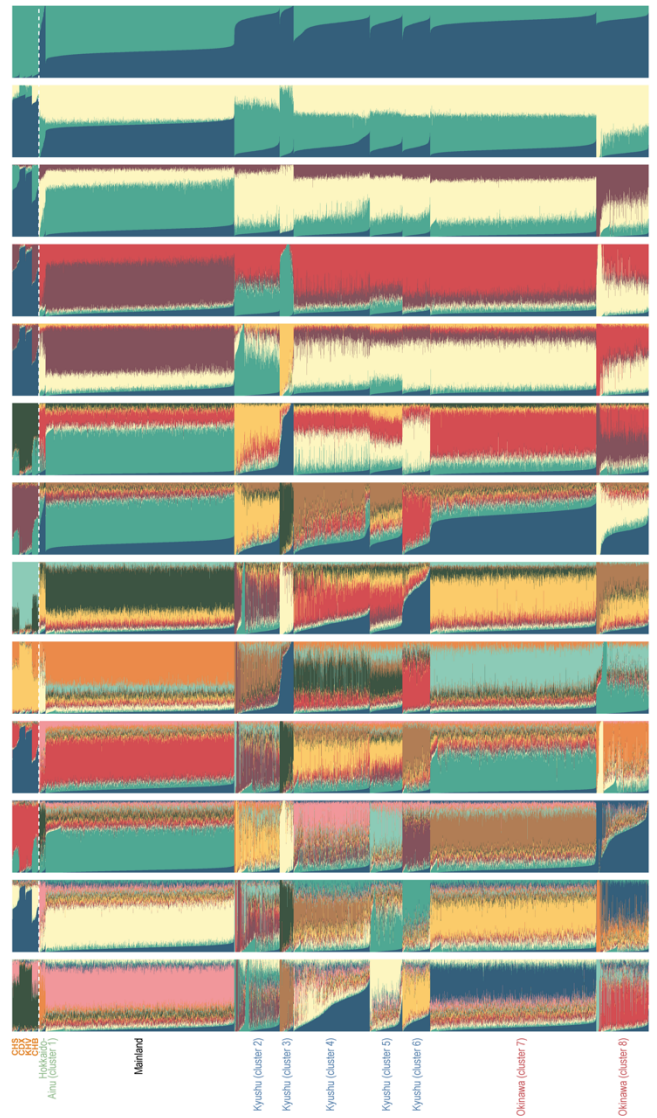

### Supplementary Figure 7. ADMIXTURE analyses with varying number of ancestral components.

The unsupervised maximum-likelihood estimation under a model with 2 to 14 ancestral components (from top to bottom). **(a)** The result for BioBank Japan individuals. **(b)** The result for BioBank Japan individuals merged with other East Asian populations in 1KGP (i.e., Southern Han Chinese [CHS], Chinese Dai in Xishuangbanna [CDX], Kinh in Ho Chi Minh City [KHV], Han Chinese in Beijing [CHB]).

**Supplementary Figure 8.**

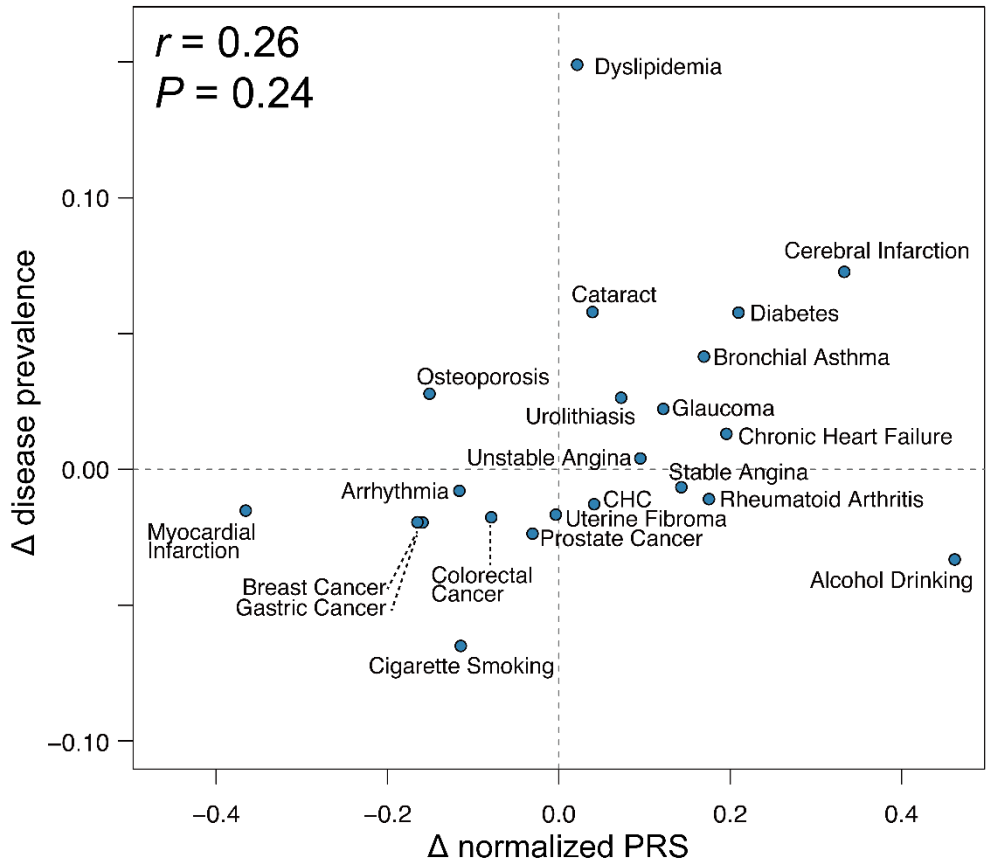

**Supplementary Figure 8. The  $\Delta$  normalized PRS and  $\Delta$  disease prevalence of 22 binary traits.**

$\Delta$  normalized PRS (= normalized PRS in non-mainland - normalized PRS in mainland) is shown on the x-axis, and  $\Delta$  disease prevalence (= disease prevalence in non-mainland - disease prevalence in mainland) is shown on the y-axis. Pearson's correlation  $r$  and  $P$  value between  $\Delta$  normalized PRS and  $\Delta$  disease prevalence are also described.

## Supplementary Table 1. Phenotype summary in the discovery GWASs.

| <i>Quantitative traits</i>         |                      |       |        |                    |         |         |                                           |
|------------------------------------|----------------------|-------|--------|--------------------|---------|---------|-------------------------------------------|
| Trait name                         | No. no missing value | Mean  | Median | Standard deviation | Minimum | Maximum | Unit                                      |
| Height                             | 78,558               | 160   | 160    | 9.03               | 117     | 198     | cm                                        |
| Body weight (BW)                   | 78,756               | 59.4  | 58.5   | 11.5               | 23      | 110     | kg                                        |
| Body mass index (BMI)              | 78,107               | 23.3  | 23     | 3.62               | 11.4    | 46.2    | kg m <sup>-2</sup>                        |
| Systolic blood pressure (sBP)      | 69,270               | 132   | 130    | 18.3               | 70      | 213     | mmHg                                      |
| Diastolic blood pressure (dbP)     | 69,235               | 77.5  | 79     | 11.5               | 35      | 125     | mmHg                                      |
| Mean arterial blood pressure (MAP) | 69,173               | 95.8  | 96     | 12.5               | 51      | 150     | mmHg                                      |
| Pulse pressure (PP)                | 69,173               | 54.7  | 54     | 13.8               | 10      | 145     | mmHg                                      |
| Total protein                      | 58,599               | 7.09  | 7.1    | 0.569              | 4.7     | 9.5     | g dL <sup>-1</sup>                        |
| Albumin                            | 53,043               | 4.2   | 4.3    | 0.45               | 2.1     | 6.1     | g dL <sup>-1</sup>                        |
| Uric acid                          | 59,968               | 5.43  | 5.3    | 1.53               | 0.3     | 12.3    | mg dL <sup>-1</sup>                       |
| Sodium                             | 64,021               | 141   | 141    | 2.72               | 128     | 154     | mEq L <sup>-1</sup>                       |
| Potassium                          | 66,644               | 4.24  | 4.2    | 0.406              | 2.6     | 5.9     | mEq L <sup>-1</sup>                       |
| Chloride                           | 63,186               | 104   | 105    | 2.88               | 94.9    | 114     | mEq L <sup>-1</sup>                       |
| Calcium                            | 39,035               | 9.18  | 9.2    | 0.527              | 6.8     | 11.5    | mg dL <sup>-1</sup>                       |
| Total cholesterol (TC)             | 64,650               | 208   | 205    | 45.7               | 20      | 469     | mg dL <sup>-1</sup>                       |
| Triglyceride (TG)                  | 53,954               | 140   | 116    | 96.8               | 9.4     | 1490    | mg dL <sup>-1</sup>                       |
| HDL cholesterol (HDL-C)            | 35,620               | 55    | 53     | 15.7               | 0.1     | 123     | mg dL <sup>-1</sup>                       |
| LDL cholesterol (LDL-C)            | 36,766               | 138   | 128    | 52.9               | 0       | 496     | mg dL <sup>-1</sup>                       |
| Blood sugar                        | 47,539               | 109   | 102    | 26.9               | 10.2    | 254     | mg dL <sup>-1</sup>                       |
| HbA1c                              | 21,737               | 5.55  | 5.4    | 0.764              | 2.96    | 10.7    | %                                         |
| Prothrombin time                   | 24,048               | 11.8  | 11.6   | 1.28               | 8.2     | 18.9    | sec                                       |
| C-reactive protein                 | 38,399               | 0.257 | 0.12   | 0.304              | 0       | 1.7     | mg dL <sup>-1</sup>                       |
| AST                                | 70,599               | 24.2  | 22     | 11                 | 5       | 105     | IU L <sup>-1</sup>                        |
| ALT                                | 70,973               | 24.6  | 19     | 19.4               | 1.6     | 256     | IU L <sup>-1</sup>                        |
| Total Bilirubin                    | 56,832               | 0.626 | 0.6    | 0.351              | 0.05    | 6.2     | mg dL <sup>-1</sup>                       |
| LDH                                | 65,995               | 233   | 198    | 107                | 45      | 993     | IU L <sup>-1</sup>                        |
| Alkaline phosphatase               | 54,104               | 241   | 225    | 97.8               | 45      | 1160    | IU L <sup>-1</sup>                        |
| γ-GTP                              | 63,836               | 45.8  | 27     | 62.2               | 1       | 905     | IU L <sup>-1</sup>                        |
| Creatine kinase                    | 55,094               | 112   | 90     | 92.7               | 7.3     | 1140    | IU L <sup>-1</sup>                        |
| Blood urea nitrogen                | 70,769               | 15.7  | 15     | 5.38               | 3.6     | 64      | mg dL <sup>-1</sup>                       |
| Creatinine                         | 72,278               | 0.786 | 0.74   | 0.252              | 0.2     | 2.97    | mg dL <sup>-1</sup>                       |
| eGFR                               | 72,280               | 73.6  | 72.5   | 20.9               | 20      | 250     | mL min <sup>-1</sup> 1.73 m <sup>-2</sup> |
| Red blood cell (RBC)               | 68,406               | 436   | 438    | 54.3               | 187     | 665     | 10 <sup>4</sup> per μL                    |
| Hb                                 | 68,024               | 13.5  | 13.5   | 1.72               | 5.5     | 20      | g dL <sup>-1</sup>                        |
| Ht                                 | 68,197               | 40.3  | 40.5   | 4.77               | 18.7    | 61.7    | %                                         |
| MCV                                | 58,184               | 92.8  | 92.9   | 5.26               | 70.4    | 115     | fL                                        |
| MCH                                | 57,479               | 31    | 31.1   | 2.03               | 22.6    | 39.4    | pg                                        |
| MCHC                               | 60,679               | 33.4  | 33.4   | 1.08               | 28.6    | 38.2    | %                                         |
| White blood cell (WBC)             | 69,000               | 6240  | 5900   | 2080               | 1450    | 23800   | per μL                                    |
| Neutrophil                         | 37,926               | 3750  | 3420   | 1680               | 572     | 20100   | per μL                                    |
| Eosinophil                         | 41,926               | 197   | 140    | 215                | 2.7     | 6590    | per μL                                    |
| Basophil                           | 39,008               | 40.9  | 31.8   | 39.4               | 0.987   | 994     | per μL                                    |
| Monocyte                           | 42,944               | 385   | 350    | 190                | 44.4    | 2670    | per μL                                    |
| Lymphocyte                         | 43,093               | 1820  | 1720   | 762                | 250     | 10500   | per μL                                    |
| Platelet (PLT)                     | 66,096               | 22.9  | 22     | 7.16               | 5.8     | 83.1    | 10 <sup>4</sup> per μL                    |

### *Binary Case Control Traits*

| Trait name            | No. case | No. control |
|-----------------------|----------|-------------|
| Arrhythmia            | 7,043    | 76,166      |
| Chronic Heart Failure | 3,215    | 79,994      |
| Myocardial Infarction | 5,711    | 77,498      |
| Stable Angina         | 7,180    | 76,029      |
| Unstable Angina       | 1,919    | 81,290      |
| Cerebral Infarction   | 7,180    | 76,029      |
| Diabetes              | 17,242   | 65,967      |
| Dyslipidemia          | 19,025   | 64,184      |
| Breast Cancer         | 2,377    | 35,929      |
| Colorectal Cancer     | 2,870    | 80,339      |
| Gastric Cancer        | 2,745    | 80,464      |
| Prostate Cancer       | 2,201    | 42,702      |
| Bronchial Asthma      | 3,453    | 79,756      |
| Rheumatoid Arthritis  | 1,870    | 81,339      |
| Chronic Hepatitis C   | 2,560    | 80,649      |
| Cataract              | 8,504    | 74,705      |
| Glaucoma              | 1,992    | 81,217      |
| Osteoporosis          | 2,763    | 80,446      |
| Urolithiasis          | 2,779    | 80,430      |
| Uterine Fibroma       | 2,619    | 35,687      |
| Ever-drink-alcohol    | 41,558   | 40,362      |
| Ever-smoke-cigarette  | 41,336   | 40,724      |

**Supplementary Table 2. Potential confounding factors in PRS prediction and their correlation with the observed PRS biases.**

| Investigated factor                                   | correlation $r$ | correlation $P$ | Descriptions                                                                                                                                                                                                                                                                                                                                                                                                                                                                                                                                               |
|-------------------------------------------------------|-----------------|-----------------|------------------------------------------------------------------------------------------------------------------------------------------------------------------------------------------------------------------------------------------------------------------------------------------------------------------------------------------------------------------------------------------------------------------------------------------------------------------------------------------------------------------------------------------------------------|
| <b>a</b> GWAS heritability                            | 0.17            | 0.24            | We assessed whether the lower the heritability (i.e. less predictive ability in PRS), the larger the bias in PRS.                                                                                                                                                                                                                                                                                                                                                                                                                                          |
| <b>b</b> Difference in GWAS heritability              | -0.30           | 0.044           | We calculated GWAS heritability within mainland and non-mainland population by GCTA software with the randomly selected same number of samples. We assessed whether the larger the difference in heritability, the larger the bias in PRS.                                                                                                                                                                                                                                                                                                                 |
| <b>c</b> Variance explained by PRS                    | 0.030           | 0.85            | We assessed whether the lower the variance explained (i.e. less predictive ability in PRS), the larger the bias.                                                                                                                                                                                                                                                                                                                                                                                                                                           |
| <b>d</b> Difference in variance explained by PRS      | 0.13            | 0.38            | We assessed whether the larger the difference in variance explained, the larger the bias.                                                                                                                                                                                                                                                                                                                                                                                                                                                                  |
| <b>e</b> Differences in potential confounding factors | -               | -               | According to the recent preprint (Mostafavi H et al. <i>bioRxiv</i> 2019), the prediction accuracy of PRSs depended on characteristics such as the age or sex composition of the individuals in GWAS even within a single ancestry (white British people in UK Biobank). Thus, we assessed whether there was difference in age and sex composition between mainland and non-mainland population. We observed that age and sex composition was mostly comparable between them (Median age; 65 vs 66 and Fraction of females; 45.6% vs 47.5%, respectively). |
| <b>f</b> Number of SNPs used in PRS                   | -0.014          | 0.93            | We assessed whether the more the number of SNPs in PRS (i.e. susceptible to genetic drift), the larger the bias in PRS.                                                                                                                                                                                                                                                                                                                                                                                                                                    |

Correlation  $r$  and  $P$  are calculated from Pearson's correlation test. Details are described in **Methods**.

**Supplementary Table 3. Summary results of GWASs and PRSs of quantitative traits.**

| Trait name                         | Observed scale<br>h <sup>2</sup> (SE) | Lambda GC | Mean Chi <sup>2</sup> | Intercept (SE)  | Ratio (SE)      | No. SNPs<br>in PRS | Explained<br>variance by<br>PRS |
|------------------------------------|---------------------------------------|-----------|-----------------------|-----------------|-----------------|--------------------|---------------------------------|
| Height                             | 0.338 (0.019)                         | 1.3615    | 1.6312                | 1.0631 (0.0134) | 0.1 (0.0213)    | 492                | 0.0360                          |
| Body weight (BW)                   | 0.1737 (0.0101)                       | 1.2332    | 1.2937                | 1.0138 (0.0088) | 0.047 (0.0301)  | 79                 | 0.0126                          |
| Body mass index (BMI)              | 0.1941 (0.0109)                       | 1.2731    | 1.3469                | 1.0321 (0.0092) | 0.0927 (0.0267) | 127                | 0.0106                          |
| Systolic blood pressure (sBP)      | 0.0578 (0.0082)                       | 1.0864    | 1.0998                | 1.0154 (0.0074) | 0.1546 (0.0742) | 36                 | 0.00197                         |
| Diastolic blood pressure (dBP)     | 0.0487 (0.0077)                       | 1.0679    | 1.0762                | 1.0073 (0.0072) | 0.0956 (0.0941) | 19                 | 0.000585                        |
| Mean arterial blood pressure (MAP) | 0.0535 (0.0082)                       | 1.0802    | 1.0902                | 1.014 (0.0076)  | 0.1549 (0.0842) | 22                 | 0.00200                         |
| Pulse pressure (PP)                | 0.0428 (0.0075)                       | 1.0649    | 1.0765                | 1.0143 (0.0073) | 0.1863 (0.0953) | 28                 | 0.000687                        |
| Total protein                      | 0.0873 (0.0117)                       | 1.105     | 1.1294                | 1.0219 (0.0083) | 0.1694 (0.0639) | 69                 | 0.0126                          |
| Albumin                            | 0.0603 (0.0104)                       | 1.0618    | 1.0743                | 1.0071 (0.0076) | 0.0957 (0.103)  | 27                 | 0.00322                         |
| Uric acid                          | 0.141 (0.0377)                        | 1.0833    | 1.2036                | 0.9997 (0.0075) | < 0             | 180                | 0.0378                          |
| Sodium                             | 0.0683 (0.0091)                       | 1.0772    | 1.0903                | 0.9969 (0.0081) | < 0             | 25                 | 0.00163                         |
| Potassium                          | 0.0574 (0.0107)                       | 1.0895    | 1.0951                | 1.0141 (0.0085) | 0.1478 (0.0895) | 25                 | 0.00148                         |
| Chloride                           | 0.0658 (0.0088)                       | 1.0864    | 1.1032                | 1.0164 (0.0078) | 0.1589 (0.0753) | 40                 | 0.00224                         |
| Calcium                            | 0.042 (0.0157)                        | 1.0557    | 1.0524                | 1.0227 (0.0071) | 0.4338 (0.1354) | 29                 | 0.00275                         |
| Total cholesterol (TC)             | 0.084 (0.0127)                        | 1.0772    | 1.1336                | 1.0192 (0.0093) | 0.1435 (0.0699) | 127                | 0.0316                          |
| Triglyceride (TG)                  | 0.0993 (0.0296)                       | 1.0618    | 1.1343                | 1.0236 (0.0087) | 0.1758 (0.0646) | 121                | 0.0332                          |
| HDL cholesterol (HDL-C)            | 0.1515 (0.0255)                       | 1.0864    | 1.1484                | 1.0391 (0.009)  | 0.2635 (0.0607) | 150                | 0.0780                          |
| LDL cholesterol (LDL-C)            | 0.0748 (0.0167)                       | 1.0405    | 1.0656                | 1.0073 (0.0081) | 0.1115 (0.1235) | 50                 | 0.0246                          |
| Blood sugar                        | 0.0366 (0.0111)                       | 1.0466    | 1.0574                | 1.0215 (0.0074) | 0.3742 (0.1284) | 42                 | 0.00616                         |
| HbA1c                              | 0.1325 (0.0266)                       | 1.0466    | 1.0735                | 1.0149 (0.0076) | 0.2027 (0.1029) | 36                 | 0.0133                          |
| Prothrombin time                   | 0.0426 (0.0246)                       | 1.0285    | 1.038                 | 1.0159 (0.0077) | 0.4189 (0.2035) | 31                 | 0.0178                          |
| C-reactive protein                 | 0.0216 (0.0126)                       | 1.0496    | 1.0567                | 1.0397 (0.0071) | 0.7003 (0.1254) | 38                 | 0.00268                         |
| AST                                | 0.0661 (0.0105)                       | 1.0833    | 1.1128                | 1.0156 (0.0084) | 0.1385 (0.0743) | 59                 | 0.00856                         |
| ALT                                | 0.0578 (0.0107)                       | 1.0649    | 1.0976                | 1.0095 (0.0084) | 0.0975 (0.0857) | 56                 | 0.00499                         |
| Total Bilirubin                    | 0.0622 (0.0285)                       | 1.0496    | 1.098                 | 1.0237 (0.007)  | 0.2417 (0.0713) | 101                | 0.0544                          |
| LDH                                | 0.0366 (0.0074)                       | 1.0833    | 1.0815                | 1.0324 (0.0077) | 0.3973 (0.0942) | 60                 | 0.00958                         |
| Alkaline phosphatase               | 0.1226 (0.0426)                       | 1.0988    | 1.1695                | 1.0403 (0.0101) | 0.2375 (0.0596) | 152                | 0.0504                          |
| γ-GTP                              | 0.0819 (0.0144)                       | 1.0802    | 1.1278                | 1.0219 (0.0079) | 0.1712 (0.0617) | 92                 | 0.0103                          |
| Creatine kinase                    | 0.0978 (0.012)                        | 1.0926    | 1.1274                | 1.0158 (0.0081) | 0.124 (0.0636)  | 94                 | 0.0101                          |
| Blood urea nitrogen                | 0.0708 (0.0091)                       | 1.1082    | 1.1381                | 1.0346 (0.008)  | 0.2504 (0.058)  | 48                 | 0.00719                         |
| Creatinine                         | 0.1038 (0.0109)                       | 1.1459    | 1.1926                | 1.0331 (0.0088) | 0.1716 (0.0455) | 111                | 0.00647                         |
| eGFR                               | 0.1151 (0.0111)                       | 1.1459    | 1.2089                | 1.0318 (0.0094) | 0.1523 (0.045)  | 101                | 0.00953                         |
| Red blood cell (RBC)               | 0.1271 (0.0144)                       | 1.1459    | 1.2183                | 1.0338 (0.0102) | 0.1548 (0.0467) | 152                | 0.0253                          |
| Hb                                 | 0.0778 (0.0098)                       | 1.0988    | 1.1275                | 1.016 (0.0086)  | 0.1259 (0.0671) | 64                 | 0.00681                         |
| Ht                                 | 0.0813 (0.0094)                       | 1.105     | 1.1337                | 1.0157 (0.0089) | 0.1177 (0.0665) | 63                 | 0.00804                         |
| MCV                                | 0.1985 (0.0232)                       | 1.1333    | 1.266                 | 1.0222 (0.0106) | 0.0833 (0.0398) | 234                | 0.0636                          |
| MCH                                | 0.1746 (0.023)                        | 1.1113    | 1.2359                | 1.0245 (0.0103) | 0.1038 (0.0435) | 222                | 0.0618                          |
| MCHC                               | 0.0512 (0.0124)                       | 1.0557    | 1.0967                | 1.0327 (0.0087) | 0.3376 (0.0899) | 93                 | 0.0231                          |
| White blood cell (WBC)             | 0.1165 (0.0119)                       | 1.1459    | 1.1966                | 1.0314 (0.0101) | 0.1597 (0.0514) | 103                | 0.0140                          |
| Neutrophil                         | 0.0952 (0.0175)                       | 1.0741    | 1.0939                | 1.0194 (0.0088) | 0.2071 (0.0937) | 52                 | 0.0110                          |
| Eosinophil                         | 0.0618 (0.0155)                       | 1.0618    | 1.0852                | 1.0312 (0.0073) | 0.3662 (0.0859) | 59                 | 0.00595                         |
| Basophil                           | 0.0933 (0.0173)                       | 1.0741    | 1.1031                | 1.0299 (0.0083) | 0.2904 (0.081)  | 65                 | 0.0104                          |
| Monocyte                           | 0.0742 (0.0144)                       | 1.071     | 1.0997                | 1.0346 (0.0082) | 0.3474 (0.0823) | 70                 | 0.0159                          |
| Lymphocyte                         | 0.0749 (0.0124)                       | 1.0679    | 1.0804                | 1.0128 (0.0081) | 0.1598 (0.1007) | 41                 | 0.00584                         |
| Platelet (PLT)                     | 0.1664 (0.0159)                       | 1.1523    | 1.2567                | 1.0284 (0.0084) | 0.1105 (0.0328) | 227                | 0.0383                          |

SE; standard error.
